# Supplementary material for: A Transfected Babesia bovis Parasite Line Expressing eGFP Is Able to Complete the Full Life Cycle of the Parasite in Mammalian and Tick Hosts
Source: MDPI journal article supplement (doi:10.3390/pathogens11060623), 2022-05-27
Supplement: s1 [file s1]

## AM sequence appended to 3' end of BBOV\_I1005480 base pair position

ATGTGCCAAGATCCTCAACGCAAAGGCAACGTGATACTCTCTCAGGCTTACGGGTGCCAAGATCCTCAACGCAA  
GGCAACGTGATACTCTCTCAGGCTTACTAG

## PCR amplicons sequences

### Seq 1. TfBbo5480 acquisition PCR 1

ACAAAATTTCAATTGCACGTTAAACCTGCTATTATAAGGATTGCCATATAATAGTGTACGTGAGTCAGTATCATATT  
GTCAACAGGAAAACACAAATTATTTTAGAGAACCAATAGTATGAAAACATTTTCGACAACTGTGTAACGCTTTTT  
GCAATGCATTATGCGGTGCATAATGCCTGAGCTCGAATTAGCGACATGTAAATACACCCAAAAACGTCTGAGAC  
GTGGGTTTCATTATTGTACTAGACAGATTGAGAGTTAAACAACAGCTAAAGCTCATTAGATGCTTTGTTAAGTGATT  
CTTCAAATGTCTCTACGACATCTATAATTTAAAGATTGCGTCTTTGGTAGACACGGGTAAATTATCAACGAATCAAC  
AATTCATGGCCTTGCCGGTCTATTCAACATTCTAAATAGATGTATTCCAGTGGCCTGCTTTACAGGTTATCGCCAAG  
ACAATTCTAATAACGAAGATAGTGGTGTCCATGGAATCTGCAACCCGTGCGGTGCAGATGGCGTACGCGTCTACA  
TAGGTAGAAAAGTGGTAATAGTGATTTTACCGGATACGATAGTATCTTCTAGGGTTACATTAGCTACATGACATCAC  
AATCATTACGTCTTAAATTCAGTAAATCTTGGGTCTCGCGTTACCACAGCTCGTCTATTGGGCAATAATTTAGA  
CCCCACCATCGGGGGCGCTCCGTGCGAGGTAGTAAATATTCACTCGAAGGGAAATATAGCGCATCCAAAGTGGC  
GTTATATTTCTATCAACACGATCAAACTGCTTTAAGGAGGGCAAAGCACCTTCTTTAAAATTTTAACTTACTTATT  
TACCTTTATTTAGCCCAAAGAGGGATAAGGTCTTATTGGCTGTACGAGGGCCCATGTCACTGACTGCTCAGCCGA  
ACACGTTGCACAGGAAGTGCCTACTCACGTTATCCCTATTCTGAGAACTACATGGGATATTACCCTGGTGATATG  
AGTGCAAGTCTACAATGTCACGGTTACCTGCCTTCTCTCAATACACTCAATATTATGATGACCCTTACATGGGTAC  
AGCGGTTGACTACATGAACGTCACCTGTTACCAGATGGTCCCAGATGACCATCATGGTTACGTCGACTCTCATGTT  
GGACAAATGCCCCACTACTCCGGTGGCATGATGTACCATCCTATGGAGATGACATACTGCCCTCTACTGGGCAGA  
TGTAATATCAACACCTGGATCGAGTACCGTACCGGCATTAAGCAGCGTCAAGGGGGATCCCGATGACGATGCTC  
GTACTTTTACTGAATGCAGTACTGCGGCACTACTCCTAACTTGAACACTGCCCCAACCCGAAGTCGTTGAAGA  
TGGATTTGATCTTGTTATGGATACGACTACGACCGATACGCAGTATCACCTTCTGACTGCTACCTCGCCAAAGTG  
CTGGGTTTAGCGGTTACCCTGGTACTGTGTGTCCAACCTTTGACGATGTATTTTCCGCTTGTGGCGACCAGGACCCT  
TTAGTGAACGATGCTATGGTTGTGGAGATTGCTGACGAGATAGCGGCCAACGTCCAGTATTTACCAGACAAGGAA  
TCCAGTGGTAAATACTCACTTGACAAAAACCAACCGATTGCGTCTGGCGTGATCTCAACAGAGGTCACTGCA  
GTTGGCGTTGCCGCTGGTGGGAGAACGGCAAGCGTTTGAGTAAGAACTTCAACGTGAAACGCTTCGGTGAGCAT  
GAGGCCATGTGGATGGCCATTGCTATGAAGATTCGTAACCTACGCCTGTTGAGCGTTTTAGTACTCAAGGAGC  
AGCGTGAAGCTGTTGCAACTACTGTGAGCTTGTGCGTCAAACGTTGATGGGTGCGTTGTTGACTATCGTGTGTA  
TCCAAAAAGTTCTATTGCTATAGCTCAGATTGGCACTGCTACGCGCAAGGCCGATCACCTCTGAACAGCACTAAG  
AGTGCTCAGAAGGCCAACTGGGCGCGCATCGCTTGACCTATGTTATGGTTTCTGAACGTCGTTCTGCTGCTAGCA  
GTGTAGTTTGTGCTCTATGTGCGAAGACTACTAAATGCTCTCGCAGTCGTAACCTGCAACAGGCGCATATAATGCA  
CCTCATTGCTATGCACAAGAACCCTTGGAAGCAGTATTTGGATGAGGAGGGACTCACTAAAATGTGTAGATCCGCT  
CTGGATGCTTTGTATCAGCAGCGTGTTTTACTGCTACAAGTGAATGGAAGTTGAGGCCGGGTCTCACTCCACCTG  
AGCCTGGGTTGATTGTTCTTCAATGGTTGATGGTGATAGTGTGTTGGATGCTAGCATGTGCCAAGATCCTCAACG  
CAAAGGCAACGTGATACTCTCTCAGGCTTACGGGTGCCAAGATCCTCAACGCAAAGGCAACGTGATACTCTCTCAG  
GCTTACTAGCCGCGGTCTAGAGGATCCTAATGGCACAACTCAACAAATGATGTATCGTCATCTGATCCATCGGTT  
TTCAATATTGTATTGGATGCAATATCTGAATGCATATGATGCGACAGTTTCCATCATCGGGTGCCGAATCGTAAC  
TCATAACACCATTTTAAAGTTATGTAACTAGTATCTATGTTTATGGTTTACGTAAAATGAATGTTTGAGTCTACAGG

AAGGAACACGTGTGTAGTAAGTATTTATTTCTGTAATGTACGTCATATATTTTATGTATACGTGAACCTCACTAAAG  
GAAATTTTTGATGTTTTACGTATGCATTTATTAACAACACTCTGTTAAATTATTCCATACGCTAAGATATGATTCCT  
TTCTCGCAAATCTCCCCGGGCTGCTGGAAAAAATCAATTGATATATAAAATAAACTTATATAAACACGTAATAAAT  
GAGATAAAATAATATATGTCATGTATAAATTTGGGGTATAATTTAATTGTAGAAGGTGGAGATAGTACGGTAAAA  
ACTGAGATGATATATAATATATGATGAATATATAAACTTGACAGGTCAAGATTACTTGATCAGATTTAATTAGTTGT  
GATAAAGCGGAAATCCCATATATGTCATCCCGTTAAAGGTATTAATAGCATTTTAAGAATATATTTACAAATATG  
ATATACCATACATCTGATAGAATTATGCATCGATATTCGTCGTTATAGGCTTAGTTGCGCACAACGAAAAGGTATG  
TGTATATACTTAATTATATTTCAATCAAACGATGGGTGACAAATGTGTGGCTGGAGCAAAGCAAAACAGCACCAC  
AACCTTTACAAAGGGATCTTCATTAGTCCTTTCAGTGTCTTTATAACTTAATAAAGTAATTCACGCAAGAATAGT  
GATTATATCGCCAACAACGCACTTTTGTGATGTAAGTCAGGCCCTGTCATTTTGCTTTGTGGGTGGTGTATTTC  
TGAAGCAGGCGACTACTTCTGTCGAGCTGCTGTGTATATTCTACTTTTGAGGCTATTATATACTGATGTGTT  
TAGACATTTGTGTTATTTAATGCTTGATTTAACGTTTTTCAATTGTGTTTGCCGATACTAATGTTGTCTCAGATATA  
ATTTATTGCACTTTACGAAAATAAGCTTATGGTGAGCAAGGGCGAGGAGCTGTTACCGGGGTGGTGCCCATCC  
TGGTCGAGCTGGACGGCGACGTAAACGGCCACAAGTTCAGCGTGTCCGGCGAGGGCGAGGGCGATGCCACCTAC  
GGCAAGCTGACCCTGAAGTTCATCTGCACCACGGCAAGCTGCCGTGCCCTGGCCACCCTCGTGACCACCCTGA  
CCTACGGCGTGCACTGCTTCAGCCGCTACCCGACCACATGAAGCAGCACGACTTCTTCAAGTCCGCCATGCCCGA  
AGGCTACGTCCAGGAGCGCACCATCTTCTCAAGGACGACGGCAACTACAAGACCCGCGCCGAGGTGAAGTT

## Seq 2. TfBbo5480 transmission PCR 1

ACAAAATTTCAATTGCACGTTAAACCTGCTATTATAAGGATTGCCATATAATAGTGACGTGAGTCAGTATCATATT  
GTCAACAGGAAAACACAAATTATTTTAGAGAACCAATAGTATGAAAACATTTTCGACAACTGTGTAACGCTTTTT  
GCAATGCATTATGCGGTGCATAATGCCTGAGCTCGAATTAGCGACATGTAAATACACCCAAAAACGTCTGAGAC  
GTGGGTTTCATTATTGTACTAGACAGATTGAGAGTTAAACAACAGCTAAAGCTCATTAGATGCTTTGTTAAGTGATT  
CTTCAAATGTCTCTACGACATCTATAATTTAAAGATTGCGTCTTTGGTAGACACGGGTAATTATCAACGAATCAAC  
AATTCATGGCCTTGCCGGTCTATTCAACATTCTAAATAGATGTATTCCAGTGGCCTGCTTTACAGGTTATCGCCAAG  
ACAATTCTAATAACGAAGATAGTGGTGTCCATGGAATCTGCAACCCGTGCGGTGCAGATGGCGTACGCGTCTACA  
TAGGTAGAAAGTGGAATAGTGATTTTACCGGATACGATAGTATCTTCTAGGGTTACATTAGCTACATGACATCAC  
AATCATTACGTCTTAAATTCAGTAAATCTTGGGTCTCGCGTTACCACAGCTCGTCTATTGGGCAATAATATTTAGA  
CCCCACCATCGGGGGCGCTCCGTGCGAGGTAGTAAATATTCACTCGAAGGGGAAATATAGCGCATCCAAAGTGGC  
GTTATATTTCTATCAACACGATCAAACTGCTTTAAGGAGGGCAAAGCACCTTCTTTAAATTTTAACTTACTTATT  
TACCTTTATTTAGCCCAAAGAGGGATAAGGTCTTATTGGCTGTACGAGGGCCCATGTCACTGACTGCTCAGCCCGA  
ACACGTTGCACAGGAAGTGCCTACTCACGTTATTCCTATTCTGAGAACTACATGGGATATTACCCTGGTGATATG  
AGTGCAGGTCTACAATGTCACGGTTACCTGCCTTCTCCTCAATACACTCAATATTATGATGACCCTTACATGGGTAC  
AGCGGTTGACTACATGAACGTCACCTGTTACCAGATGGTCCAGATGACCATCATGGTTACGTCGACTCTCATGTT  
GGACAAATGCCCCGACTACTCCGGTGGCATGATGTACCATCCTATGGAGATGACATACTGCCCTCCTACTGGGCAGA  
TGTAATCAAAACACCTGGATCGAGTACCGTACCGGCAATTAAGCAGCGTCAAGGGGGATCCCGATGACGATGCTC  
GTACTTTTACTGAATGCAGTACTGCGGCAACTACTCCTAAGTGAACACTGCCCCAACCCGAAGTCGTTGAAGA  
TGGATTTGATCTTGTTATGGATACGACTACGACCGATACGAGTATCACCTTCTGACTGCTACCCTCGCCAAAGTG  
CTGGGTTTAGCGGTTACCCTGGTACTGTGTGTTCAACTTTGACGATGTATTTCCGCTTGTTGGCGACCAGGACCCT  
TTAGTGAACGATGCTATGTTGTGGAGATTGCTGACGAGATAGCGGCCAACGTCCAGTATTTACCAGACAAGGAA  
TCCAGTGGTAAATACTCACTTGACAAAAACACCCGATTCAATTGCGTCTGGCGTGATCTCAACAGAGGTCACTGCA  
GTTGGCGTTGCCGCTGGTGGGAGAACGGCAAGCGTTGAGTAAGAACTTCAACGTGAAACGCTTCGGTGAGCAT  
GAGGCCATGTGGATGGCCATTGCTATGAAGATTCGTAAGTCTACGCTGTTGAGCGTTTTAGTTACTCAAGGAGC  
AGCGTGAAGCTGTCGCAACTACTGTGAGCTGTGCGTCAAACGTTGATGGGTGCGTTGTTGACTATCGTGTGA

TCCAAAAAGTTCTATTGCTATAGCTCAGATTGGCACTGCTACGCGCAAGGCCCGATCACCTCTGAACAGCACTAAG  
 AGTGCTCAGAAGGCCAACTGGGCGCGCATCGCTTGGACCTATGTTATGGTTTCTGAACGTCGTTCTGCTGCTAGCA  
 GTGTAGTTTGTCTCTATGTGCGAAGACTACTAAATGCTCTCGCAGTCGTAACTGCAACAGGCGCATATAATGCA  
 CCTATTTCGTATGCACAAGAACCCTTGGAAGCAGTATTTGGATGAGGAGGGACTCACTAAAATGTGTAGATCCGCT  
 CTGGATGCTTTGTATCAGCAGCGTGGTTTTACTGCTACAAGTGAATGGAAGTTGAGGCCGGGTCTCACTCCACCTG  
 AGCCTGGGTTTCGATTGTTCTTCAATGGTTGATGGTGATAGTGTGTTTGGATGCTAGCATGTGCCAAGATCCTCAACG  
 CAAAGGCAACGTGATACTCTCTCAGGCTTACGGGTGCCAAGATCCTCAACGCAAAGGCAACGTGATACTCTCTCAG  
 GCTTACTAGCCGCGGTCTAGAGGATCCTAATGGCACAACTCAACAAATGATGTATCGTCATCTGATCCATCGGTT  
 TTCAATATTGTATTGGATGCAATATCTGAATGCATATGATGCGACAGTTTCCATCATCGGGTGCCGAATCGTAACTC  
 TCATAACACCATTTTAAAGTTATGTAACTAGTATCTATGTTTATGGTTTACGTAAAATGAATGTTTGAGTCTACAGG  
 AAGGAACACGTGTGTAGAAGTATTTATTTCTGTAATGTACGTCATATATTTTATGTATACGTGAACCTCACTAAAG  
 GAAATTTTTGATGTTTTACGTATGCATTTATTAACAACACTCTGTTAAATTATTCCATACGCTAAGATATGATTCCT  
 TTCTCGAAATCTCCCCGGGCTGCTGGAAAAAATCAATTGATATATAAAATAAACTTATATAAACCACGTAATAAAT  
 GAGATAAATAAATATATGTCATGTATAAATTTGGGGTATAATTTAATTGTAGAAGGTGGAGATAGTACGGTAAAA  
 ACTGAGATGATATATAATATATGATGAATATATAAACTTGACAGGTCAAGATTACTTGATCAGATTTAATTAGTTGT  
 GATAAAGCGGAAATCCCATATATGTCATCCCGTTAAAGGTATTAATAGCATTTTAAGAATATATTTACAAATATG  
 ATATACCATACATCTGATAGAATTATGCATCGATATTCGTCGTTATAGGCTTAGTTGCGCACAACGAAAAGGTATG  
 TGTATATACTTAATTATATTTCAATCAAACGATGGGTGACAAATGTGTGGCGTGGAGCAAAGCAAAACAGCACCAC  
 AACCTTTACAAAGGGATCTTCATTAGTCCTTGCAGTGTCTTTATACTTAATAAAGTAATTCCACGCAAGAATAGT  
 GATTATATCGCCAACAACGCACTTTTGTGATGTAAGTCAGGCCCTGTCATTTTGCTTTGTGGGTGGTGTATTTC  
 TGAAGCAGGCGACTACTTCTGTCGAGCTGCTGTGTGTATATTCTACTTTTGAGGCTATTATATACACTGATGTGTT  
 TAGACATTTGTGTTATTTAATGCTTGATTTAACGTTTTTCAATTGTGTTTGCCGATACTAATGTTGTCTCAGATATA  
 ATTTATTGCACTTTACGAAAATAAGCTTATGGTGAGCAAGGGCGAGGAGCTGTTACCCGGGGTGGTGCCCATCC  
 TGGTCGAGCTGGACGGCGACGTAAACGGCCACAAGTTCAGCGTGTCCGGCGAGGGCGAGGGCGATGCCACCTAC  
 GGCAAGCTGACCCTGAAGTTCATCTGCACCACGGCAAGCTGCCCGTGCCCTGGCCACCCTCGTGACCACCCTGA  
 CCTACGGCGTGCACTGCTTCAGCCGCTACCCCGACCACATGAAGCAGCACGACTTCTTCAAGTCCGCCATGCCCGA  
 AGGCTACGTCCAGGAGCGCACCATCTTCTCAAGGACGACGGCAACTACAAGACCCGCGCCGAGGTGAAGTT

### Seq 3. TfBbo5480 acquisition PCR 2

CATATATGTCATCCCGTTAAAGGTATTAATAGCATTTTAAGAATATATTTACAAATATGATATACCATACATCTGAT  
 AGAATTATGCATCGATATTCGTCGTTATAGGCTTAGTTGCGCACAACGAAAAGGTATGTGTATATACTTAATTATAT  
 TTCAATCAAACGATGGGTGACAAATGTGTGGCGTGGAGCAAAGCAAAACAGCACCACAACCTTTACAAAGGGATC  
 TTCATTAGTCCTTGCAGTGTCTTTATACTTAATAAAGTAATTCCACGCAAGAATAGTGATTATATCGCCAACAAC  
 GCACTTTTGTGATGTAAGTCAGGCCCTGTCATTTTGCTTTGTGGGTGGTGTATTTTCATGAAGCAGGCGACTACTT  
 CTTGTCGAGCTGCTGTGTGTATATTCTACTTTTGAGGCTATTATATACACTGATGTGTTTAGACATTTGTGTTATTTA  
 ATGCTTGATTTAACGTTTTTCAATTGTGTTTGCCGATACTAATGTTGTCTCAGATATAATTTATTGCACTTTACGA  
 AAATAAGCTTATGGTGAGCAAGGGCGAGGAGCTGTTACCCGGGGTGGTGCCCATCCTGGTCGAGCTGGACGGCG  
 ACGTAAACGGCCACAAGTTCAGCGTGTCCGGCGAGGGCGAGGGCGATGCCACCTACGGCAAGCTGACCCTGAAG  
 TTCATCTGCACCACGGCAAGCTGCCCGTGCCCTGGCCACCCTCGTGACCACCCTGACCTACGGCGTGCACTGCT  
 TCAGCCGCTACCCCGACCACATGAAGCAGCACGACTTCTTCAAGTCCGCCATGCCCGAAGGCTACGTCCAGGAGC  
 GCACCATCTTCTTCAAGGACGACGGCAACTACAAGACCCGCGCCGAGGTGAAGTTCGAGGGCGACACCCTGGTGA  
 ACCGCATCGAGCTGAAGGGCATCGACTTCAAGGAGGACGGCAACATCCTGGGGCACAAGCTGGAGTACAACCTAC  
 AACAGCCACAACGTCTATATCATGGCCGACAAGCAGAAGAACGGCATCAAGGTGAACCTTCAAGATCCGCCACAAC  
 ATCGAGGACGGCAGCGTGCACTCGCCGACCACTACCAGCAGAACACCCCATCGGCGACGGCCCCGTGCTGCTG

CCCACAACCACTACCTGAGCACCCAGTCCGCCCTGAGCAAAGACCCCAACGAGAAGCGCGATCACATGGTCCTG  
CTG

#### Seq 4. TfBbo5480 transmission PCR 2

CATATATGTCATCCCGTTAAAGGTATTAATAGCATTTTAAGAATATATTTACAAATATGATATACCATACATCTGAT  
AGAATTATGCATCGATATTCGTCGTTATAGGCTTAGTTGCGCACAAACGAAAAGGTATGTGTATATACTTAATTATAT  
TTCAATCAAACGATGGGTGACAAATGTGTGGCGTGGAGCAAAGCAAAACAGCACCACAACCTTTACAAAGGGATC  
TTCATTAGTCCTTTGCAGTGTCTTTATAACTTAATAAAGTAATTCCACGCAAGAATAGTGATTATATCGCCAACAAC  
GCACTTTTGTGATGTAAGTCAGGCCCCCTGTCATTTTGCTTTGTGGGTGGTGTATTTTCATGAAGCAGGCGACTACTT  
CTTGTCGAGCTGCTGTGTGTATATTCTACTTTGAGGCTATTATATACACTGATGTGTTTAGACATTTGTGTTATTTA  
ATGCTTGATTTAACGTTTTTTCAATTGTGTTGCCGATACTAATGTTGTCTCAGATATAATTTATTGCAACTTTACGA  
AAATAAGCTTATGGTGAGCAAGGGCGAGGAGCTGTTACCGGGGTGGTGCCATCCTGGTCGAGCTGGACGGCG  
ACGTAAACGGCCACAAGTTCAGCGTGTCCGGCGAGGGCGAGGGCGATGCCACCTACGGCAAGCTGACCCTGAAG  
TTCATCTGCACCACCGCAAGCTGCCCGTGCCCTGGCCACCCTCGTGACCACCCTGACCTACGGCGTGAGTGCT  
TCAGCCGCTACCCCGACCATGAAGCAGCAGACTTCTTCAAGTCCGCCATGCCGAAGGCTACGTCCAGGAGC  
GCACCATCTTCTTCAAGGACGACGGCAACTACAAGACCCGCGCCGAGGTGAAGTTCGAGGGCGACACCCTGGTGA  
ACCGCATCGAGCTGAAGGGCATCGACTTCAAGGAGGACGGCAACATCCTGGGGCACAAGCTGGAGTACAACCTAC  
AACAGCCACAACGTCTATATCATGGCCGACAAGCAGAAGAACGGCATCAAGGTGAACCTTCAAGATCCGCCACAAC  
ATCGAGGACGGCAGCGTGAGCTCGCCGACCACTACCAGCAGAACACCCCCATCGGCGACGGCCCCGTGCTGCTG  
CCCGACAACCACTACCTGAGCACCCAGTCCGCCCTGAGCAAAGACCCCAACGAGAAGCGCGATCACATGGTCCTG  
CTG

#### Seq 5. TfBbo5480 acquisition PCR 3

GAGCAACGGCTACAATCAACAGCATCCCCATCTCTGAAGACTACAGCGTCGCCAGCGCAGCTCTCTCTAGCGACGG  
CCGCATCTTCACTGGTGTCAATGTATATCATTTTACTGGGGGACCTTGTGCAGAACTCGTGGTGCTGGGCACTGCT  
GCTGCTGCGGCAGCTGGCAACCTGACTTGTATCGTCGCGATCGGAAATGAGAACAGGGGCATCTTGAGCCCCCTGC  
GGACGGTGCCGACAGGTGCTTCTCGATCTGCATCCTGGGATCAAAGCCATAGTGAAGGACAGTGATGGACAGCC  
GACGGCAGTTGGGATTCTGAATTGCTGCCCTCTGGTTATGTGTGGGAGGGCTAAGAATTCATGATCGCTGATGG  
TGCATAAAATAGTGTAACACGTTGTTTATTTTACTCTTTATATAAGGATAACATTCTTTGTTCTTCATCGATAATGTG  
GTATAATACTGACTGCCGGTTTTATTGGTAATCATTTCCGGCTCAGTTGCTTTTAGTACATCAATTTAATTATTATCT  
GTTTTATTTGTTTTATAGTGTTTTAGTTTCTAGCACTTATCAAATCACGGGGTTCCGGTCGCATTACACTGCTATGT  
GCTTTGAAATCGGTGTTTCGTTAGGCCTAATAATTACTAGTTACTATTATATGCAACGATTAAACAGATAAATTATATC  
GGCAGTGTTTTGTTAAGCTTCTTGGCACGCTTTATTGCTCTGCGCCGAGCTTCCCATCTTGATCGTGTGCTGCAGT  
CTCCTTTAACTGTGCGTTCAGTCGTTCCATATATGCCTTCTTCTGTTGATATATCTACTAGTGTAGGTAGCTCATCT  
TGATATCGCTCATCCTCAACTTCTTCATCTGAGTCTGCCTCAAACACCACATGCTTCTGTTGAGTTTGTGTTGATTGTTT  
CCACACCACGTAGTTTAGCAACACCATGCCTATTTAATCGGAATTTCTTCTTGTGATGCTAGGTTGGCTTTCAGCT  
TTACATCTTCGTTATCCTCTGTTGCCTTTGTTCTATGTAATGTTTCAGGTCGTCATCCACTCTCGAGGCATCAGTTCC  
AACACGTGTGAGTATATTATCCGTGTCAGCGTCAGATTCATCGGACGATTCATCCGAATCCACGACAGTACTACTG  
ACATCAGACTCACTGCGATGTCCACCTTTGTTTCATTAGACAGCTGTTTCTTGGCTTTTATCTTTTCTTTAGCTTCG  
AGAGCTTCGAAGGCTTTTCGCTAGTATTGTCAATTTACAGTTATTTGGGGTGCTGATGGCAATCCGCTGGCTAATGC  
CATTTGCTGCACAGATTCAACGAGTTCAGCACCGGAGAGTGTAACAGATTTACGCGTGGATAGATAGCGCATATA

TGATATAACAGCGCGTTGTGCGATTCCTTAATCCAGGCTTCCTTTGCCATTAAGGCCTGTAGTTTTGTAGGACAT  
 AGTTTTCTTGCGTTGTAGGAACGGCAATAGCAATTCGTTAGGTTGTGCAACTTCACTCCAGATGTTTTGAGTTGT  
 TCCACGAATGATGCTTCATTTTCACTAATTATAGAGAATGCGATACCAAAGCTGCGCGTTCCTTCCACGGTCAACCT  
 ACCGGTACGGCCACGCGATGCGTATATGTGTTGACAGAGTCTGGTATATCCAGCTGTACTACGTAATCCACTGCT  
 GGGAAAGTCAACTCCACGTGATCCTACATCAGTAGTAAAAATACATCCATTATTTTGCTTTGCTGCAAATCGAGTGA  
 ACTGTTCAATTCGTTTAAGTTGACTTTGTTTACCATGCCACTCCGTCATTGGCACTGCAGGGATCAGTCTTTGAATA  
 CCTCGAAAACAGTCTAACGTGCTTACACGTTGCTAGGAATACTATAAAGCGTTTGTTTTGATTCTTGCT

#### **Seq 6. TfBbo5480 transmission PCR 3**

GAGCAACGGCTACAATCAACAGCATCCCCATCTCTGAAGACTACAGCGTCGCCAGCGCAGCTCTCTCTAGCGACGG  
 CCGCATCTTCACTGGTGTCAATGTATATCATTTTACTGGGGGACCTTGTGCAGAACTCGTGGTGCTGGGCACTGCT  
 GCTGCTGCGGCAGCTGGCAACCTGACTTGTATCGTCGCGATCGGAAATGAGAACAGGGGCATCTTGAGCCCCTGC  
 GGACGGTGCCGACAGGTGCTTCTCGATCTGCATCCTGGGATCAAAGCCATAGTGAAGGACAGTGATGGACAGCC  
 GACGGCAGTTGGGATTCTGAATTGCTGCCCTCTGGTTATGTGTGGGAGGGCTAAGAATTCATGATCGCTGATGG  
 TGCATAAAATAGTGTAACACGTTGTTTATTTTACTCTTTATATAAGGATAACATTCTTTGTTCTTCATCGATAATGTG  
 GTATAATACTGACTGCCGGTTTTATTGGTAATCATTTGCGCTCAGTTGCTTTTAGTACATCAATTTAATTATTATCT  
 GTTTTATTCGTTTTATAGTGTTTTAGTTTCTAGCACTTATCAAACACGGGGTTCCGTCGCATTACACTGCTATGT  
 GCTTTGAAATCGGTGTTTCGTTAGGCCTAATAATTACTAGTTACTATTATATGCAACGATTAACAGATAATTATATC  
 GGCAGTGTTTTGTTAAGCTTCTTGGCACGCTTATTGCTCTGCGCCGAGCTTCCATTCTTGATCGTGTGCTGCAGT  
 CTCCTTAACTGTGCGTTCAGTCGTTCCATATATGCCTTCTCTGTTGATATATCTACTAGTGTAGGTAGCTCATCT  
 TGATATCGCTCATCCTCAACTTCTTCATCTGAGTCTGCCTCAAACACCACATGCTTCTGTTGAGTTTGTGATTGTTT  
 CCACACCACGTAGTTTAGCAACACCATGCCTATTTAATCGGAATTTCTTCTTGTGATGCTAGGTTGGCTTTCAGCT  
 TTACATCTTCGTTATCCTCTGTTGCCTTTTGTCTATGTAATGTTTCAGGTCGTCATCCACTCTCGAGGCATCAGTTCC  
 AACACGTGTGAGTATATTATCCGTGTCAGCGTCAGATTCATCGGACGATTCATCCGAATCCACGACAGTACTACTG  
 ACATCAGACTCACTTGCATGTCCACCTTTGTTTCATTAGACAGCTGTTTCTTGGCTTTTATCTTTTCTTTAGCTTCG  
 AGAGCTTCGAAGGCTTTTCGCTAGTATTGTCAATTTACAGTTATTTGGGGTGCTGATGGCAATCCGCTGGCTAATGC  
 CATTTGCTGCACAGATTCAACGAGTTCAGCACCGGAGAGTGTAACAGATTTACGCGTGGATAGATAGCGCATATA  
 TGATATAACAGCGCGTTGTGCGATTCCTTAATCCAGGCTTCCTTTGCCATTAAGGCCTGTAGTTTTGTAGGACAT  
 AGTTTTCTTGCGTTGTAGGAACGGCAATAGCAATTCGTTAGGTTGTGCAACTTCACTCCAGATGTTTTGAGTTGT  
 TCCACGAATGATGCTTCATTTTCACTAATTATAGAGAATGCGATACCAAAGCTGCGCGTTCCTTCCACGGTCAACCT  
 ACCGGTACGGCCACGCGATGCGTATATGTGTTGACAGAGTCTGGTATATCCAGCTGTACTACGTAATCCACTGCT  
 GGGAAAGTCAACTCCACGTGATCCTACATCAGTAGTAAAAATACATCCATTATTTTGCTTTGCTGCAAATCGAGTGA  
 ACTGTTCAATTCGTTTAAGTTGACTTTGTTTACCATGCCACTCCGTCATTGGCACTGCAGGGATCAGTCTTTGAATA  
 CCTCGAAAACAGTCTAACGTGCTTACACGTTGCTAGGAATACTATAAAGCGTTTGTTTTGATTCTTGCT

#### **Seq 7: Figure 7 A- TF acquisition (3656 bp band)**

ATCGCTTGACCTATGTTATGGTTTCTGAACGTCGTTCTGCTGCTAGCAGTGTAGTTTGTGCTCTATGTGCGAAGAC  
 TACTAAATGCTCTCGCAGTCGTAACCTGCAACAGGCGCATATAATGCACCTCATTCGATGCACAAGAACCCTTGG  
 AAGCAGTATTTGGATGAGGAGGGACTCACTAAAATGTGTAGATCCGCTCTGGATGCTTTGTATCAGCAGCGTGGT  
 TTTACTGCTACAAGTGAATGGAAGTTGAGGCCGGGTCTACTCCACCTGAGCCTGGGTTCGATTGTTCTTCAATGG  
 TTGATGGTGATAGTGTGTTGGATGCTAGCATGTGCCAAGATCCTCAACGCAAAGGCAACGTGATACTCTCTCAGGC  
 TTACGGGTGCCAAGATCCTCAACGCAAAGGCAACGTGATACTCTCTCAGGCTTACTAGCCGCGGTCTAGAGGATCC

TAATGGCACAACTCAACAAATGATGTATCGTCATCTGATCCATCGGTTTTCAATATTGTATTGGATGCAATATCTG  
 AATGCATATGATGCGACAGTTTCCATCATCGGGTGCCGAATCGTAACTCTCATAACACCATTTTAAGTTATGTAAAC  
 TAGTATCTATGTTTATGGTTTACGTAAAATGAATGTTTGAGTCTACAGGAAGGAACACGTGTGTAGAAGTATTTAT  
 TTCGTGAATGTACGTACATATATTTTATGTATACGTGAACCTCACTAAAGGAAATTTTGTATGTTTTACGTATGCATT  
 TATTAACAACACTCTGTAAATTATTCCATACGCTAAGATATGATTCTTTCTCGCAAATCTCCCCGGGCTGCTGGA  
 AAAAAATCAATTGATATATAAATAAACTTATATAAACACGTAATAAATGAGATAAATAAATATATGTCATGTATAA  
 ATTTGGGGTATAATTTTAATTGTAGAAGGTGGAGATAGTACGGTAAAACTGAGATGATATATAATATATGATGA  
 ATATATAAACTTGACAGGTCAAGATTACTTGATCAGATTTAATTAGTTGTGATAAAGCGGAAATTTCCCATATATGTC  
 ATCCCGTTAAAGGTATTAATAGCATTTTAAGAATATATTTACAAATATGATATACCATACATCTGATAGAATTATG  
 CATCGATATTCGTCTGTTATAGGCTTAGTTGCGCACACGAAAAGGTATGTGTATATACTTAATTATATTTCAATCAA  
 ACGATGGGTGACAAATGTGTGGCGTGGAGCAAAGCAAACAGCACCACAACCTTTACAAAGGGATCTTCATTAGT  
 CCTTGCAAGTGTCTTTATAACTTAATAAAGTAATTCCACGCAAGAATAGTGATTATATCGCCAACAACGCACTTTTG  
 TGATGTAAGTCAGGCCCTGTCAATTTGCTTTGTGGGTGGTGTATTTCATGAAGCAGGCGACTACTTCTTGTCGAG  
 CTGCTGTGTGTATATTCTACTTTTGAGGCTATTATATACACTGATGTGTTTAGACATTTGTGTTATTTAATGCTTGAT  
 TTAACGTTTTTTCAATTGTGTTTGCCGATACTAATGTTGTCTCAGATATAATTTATTGCACTTTACGAAAATAAGCT  
 TATGGTGAGCAAGGGCGAGGAGCTGTTACCGGGGTGGTGCCATCCTGGTCGAGCTGGACGGCGACGTAAACG  
 GCCACAAGTTCAGCGTGTCCGGCGAGGGCGAGGGCGATGCCACCTACGGCAAGCTGACCCTGAAGTTCATCTGCA  
 CCACCGGCAAGCTGCCGTGCCCTGGCCACCCTCGTGACCACCCTGACCTACGGCGTGCAAGTTCAGCCGCTA  
 CCCCACCACATGAAGCAGCAGACTTCTTCAAGTCCGCCATGCCGAAGGCTACGTCCAGGAGCGCACCATCTTC  
 TTCAAGGACGACGGCAACTACAAGACCCGCGCCGAGGTGAAGTTCGAGGGCGACACCCTGGTGAACCGCATCGA  
 GCTGAAGGGCATCGACTTCAAGGAGGACGGCAACATCCTGGGGCACAAGCTGGAGTACAACAGCCACA  
 ACGTCTATATCATGGCCGACAAGCAGAAGAACGGCATCAAGGTGAACCTCAAGATCCGCCACAACATCGAGGACG  
 GCAGCGTGACGCTCGCCGACCACTACCAGCAGAACACCCCCATCGGCGACGGCCCCGTGCTGCTGCCCGACAACC  
 ACTACCTGAGCACCCAGTCCGCCCTGAGCAAAGACCCCAACGAGAAGCGCGATCACATGGTCTGCTGGAGTTCTG  
 TGACCGCCGCGGGATCACTCTCGGCATGGACGAGCTGTACAAGGCCAAGCCTTTGTCTCAAGAAGAATCCACCC  
 TCATTGAAAGAGCAACGGCTACAATCAACAGCATCCCCATCTCTGAAGACTACAGCGTCGCCAGCGCAGCTCTCTC  
 TAGCGACGGCCGCATCTTCACTGGTGTCAATGTATATCATTTTACTGGGGGACCTTGTGCAGAACTCGTGGTGCTG  
 GGCACTGCTGCTGCTGCGGCAGCTGGCAACCTGACTTGTATCGTCGCGATCGGAAATGAGAACAGGGGGCATCTTG  
 AGCCCCGCGGACGGTGCCGACAGGTGCTTCTCGATCTGCATCCTGGGATCAAAGCCATAGTGAAGGACAGTGAT  
 GGACAGCCGACGGCAGTTGGGATTCTGTGAATTGCTGCCCTCTGGTTATGTGTGGGAGGGCTAAGAATTCATGATC  
 GCTGATGGTGCATAAAATAGTGTACCACGTTGTTTATTTTACTCTTTATATAAGGATAACATTCTTTGTTCTTCATCG  
 ATAATGTGGTATAATACTGACTGCCGTTTTATTGGTAATCATTTCCGGCTCAGTTGCTTTTAGTACATCAATTTAAT  
 TATTATCTGTTTTATTTCTGTTTTATAGTGTGTTTAGTTTCTAGCACTTATCAAATCACGGGGTTCGGTCGCATTACACT  
 GCTATGTGCTTTGAAATCGGTGTTTCGTTAGGCCATAAATACTAGTTACTATTATATGCAACGATTAACAGATAA  
 TTATATCGGCAGTGTTTTGTTAAGCTTCTTGGCACGCTTTATTGCTCTGCGCCGAGCTTCCCATTCTTGATCGTGTGC  
 TGCAGTCTCCTTAACTGTGCGTTCAGTCGTTCCATATATGCCTTCTTCTGTTGATATATCTACTAGTGTAGGTAC  
 CTCATCTTGATATCGCTCATCCTCAACTTCTTCATCTGAGTCTGCCTCAAACACCACATGCTTCTGTTCAAGTTGTTG  
 ATTGTTTCCACACCACGTAGTTTAGCAACACCATGCCTATTTAATCGGAATTTCTTCTTGTGATGCTAGGTTGGCT  
 TTCAGCTTTACATCTTCGTTATCCTCTGTTGCCCTTTGTTCTATGTAATGTTTCAGGTCGTCATCCACTCTCGAGGCAT  
 CAGTTCCAACACGTGTGAGTATATTATCCGTGTCAGCGTCAGATTCATCGGACGATTATCCGAATCCACGACAGT  
 ACTACTGACATCAGACTCACTTGCGATGTCCACCTTTGTTTCATTAGACAGCTGTTTCTTGGCTTTTATCTTTTCTTT  
 AGCTTCGAGAGCTTCGAAGGCTTTTCGCTAGTATTGTCATTTACAGTTATTTGGGGTGCTG

**Seq 8: Figure 7 A- TF acquisition (1250 bp band)**

ATCGCTTGGACCTATGTTATGGTTTCTGAACGTCGTTCTGCTGCTAGCAGTGAGTTTGTGCTCTATGTGCGAAGAC  
TACTAAATGCTCTCGCAGTCGTAACCTGCAACAGGCGCATATAATGCACCTCATTCGTATGCACAAGAACCCTTGG  
AAGCAGTATTTGGATGAGGAGGGACTCACTAAAATGTGTAGATCCGCTCTGGATGCTTTGTATCAGCAGCGTGGT  
TTTACTGCTACAAGTGAATGGAAGTTGAGGCCGGGTCTCACTCCACCTGAGCCTGGGTTCGATTGTTCTTCAATGG  
TTGATGGTGATAGTGTTTTGGATTAGATGATCGCTGATGGTGCATAAAATAGTGTACCACGTTGTTTATTTTACTCT  
TTATATAAGGATAACATTCTTTGTTCTTCATCGATAATGTGGTATAATACTGACTGCCGGTTTTATTGGTAATCATT  
CGGCTCAGTTGCTTTTAGTACATCAATTTAATTATTATCTGTTTTATTTCTGTTTTATAGTGTTTTAGTTTCTAGCACT  
TATCAAATCACGGGGTTCGGTCGCATTACACTGCTATGTGCTTTGAAATCGGTGTTTCGTTAGGCCTAATAATTACT  
AGTTACTATTATATGCAACGATTAACAGATAATTATATCGGCAGTGTTTTGTTAAGCTTCTTGGCAGCCTTATTGC  
TCTGCGCCGAGCTTCCATTCTTGATCGTGTGCTGCAGTCTCCTTAACTGTGCGTTCAGTCGTTCCATATATGCCTT  
CTTCTCTGTTGATATATCTACTAGTGTAGGTACCTCATCTTGATATCGCTCATCCTCAACTTCTTCATCTGAGTCTGCC  
TCAAACACCACATGCTTCTGTTCAAGTTGTTGATTGTTTCCACACCACGTAGTTTAGCAACACCATGCCTATTTAAT  
CGGAATTTCTTCCTTGTTGATGCTAGGTTGGCTTTCAGCTTACATCTTCGTTATCCTCTGTTGCCTTTTGTCTATGT  
AATGTTTCAGGTCGTCATCCACTGCATCAGTTCCAACACGTGTGAGTATATTATCCGTGTCAGCGTCAGATTCATCG  
GACGATTCATCCGAATCCACGACGACTACTGACATCAGACTCACTTGCATGTCCACCTTTGTTTCATTAGACAG  
CTGTTTCTTGCTTTTATCTTTCTTTAGCTTCGAGAGCTTCGAAGGCTTTTCGCTAGTATTGTCATTTACAGTTATT  
TGGGGTGCTG

**Seq 9: Figure 7 A-WT acquisition (1250 bp band)**

ATCGCTTGGACCTATGTTATGGTTTCTGAACGTCGTTCTGCTGCTAGCAGTGAGTTTGTGCTCTATGTGCGAAGAC  
TACTAAATGCTCTCGCAGTCGTAACCTGCAACAGGCGCATATAATGCACCTCATTCGTATGCACAAGAACCCTTGG  
AAGCAGTATTTGGATGAGGAGGGACTCACTAAAATGTGTAGATCCGCTCTGGATGCTTTGTATCAGCAGCGTGGT  
TTTACTGCTACAAGTGAATGGAAGTTGAGGCCGGGTCTCACTCCACCTGAGCCTGGGTTCGATTGTTCTTCAATGG  
TTGATGGTGATAGTGTTTTGGATTAGATGATCGCTGATGGTGCATAAAATAGTGTACCACGTTGTTTATTTTACTCT  
TTATATAAGGATAACATTCTTTGTTCTTCATCGATAATGTGGTATAATACTGACTGCCGGTTTTATTGGTAATCATT  
CGGCTCAGTTGCTTTTAGTACATCAATTTAATTATTATCTGTTTTATTTCTGTTTTATAGTGTTTTAGTTTCTAGCACT  
TATCAAATCACGGGGTTCGGTCGCATTACACTGCTATGTGCTTTGAAATCGGTGTTTCGTTAGGCCTAATAATTACT  
AGTTACTATTATATGCAACGATTAACAGATAATTATATCGGCAGTGTTTTGTTAAGCTTCTTGGCAGCCTTATTGC  
TCTGCGCCGAGCTTCCATTCTTGATCGTGTGCTGCAGTCTCCTTAACTGTGCGTTCAGTCGTTCCATATATGCCTT  
CTTCTCTGTTGATATATCTACTAGTGTAGGTACCTCATCTTGATATCGCTCATCCTCAACTTCTTCATCTGAGTCTGCC  
TCAAACACCACATGCTTCTGTTCAAGTTGTTGATTGTTTCCACACCACGTAGTTTAGCAACACCATGCCTATTTAAT  
CGGAATTTCTTCCTTGTTGATGCTAGGTTGGCTTTCAGCTTACATCTTCGTTATCCTCTGTTGCCTTTTGTCTATGT  
AATGTTTCAGGTCGTCATCCACTGCATCAGTTCCAACACGTGTGAGTATATTATCCGTGTCAGCGTCAGATTCATCG  
GACGATTCATCCGAATCCACGACGACTACTGACATCAGACTCACTTGCATGTCCACCTTTGTTTCATTAGACAG  
CTGTTTCTTGCTTTTATCTTTCTTTAGCTTCGAGAGCTTCGAAGGCTTTTCGCTAGTATTGTCATTTACAGTTATT  
TGGGGTGCTG

**Seq 10: Figure 7 A- TF transmission (3656 bp band)**

ATCGCTTGGACCTATGTTATGGTTTCTGAACGTCGTTCTGCTGCTAGCAGTGAGTTTGTGCTCTATGTGCGAAGAC  
TACTAAATGCTCTCGCAGTCGTAACCTGCAACAGGCGCATATAATGCACCTCATTCGTATGCACAAGAACCCTTGG  
AAGCAGTATTTGGATGAGGAGGGACTCACTAAAATGTGTAGATCCGCTCTGGATGCTTTGTATCAGCAGCGTGGT  
TTTACTGCTACAAGTGAATGGAAGTTGAGGCCGGGTCTCACTCCACCTGAGCCTGGGTTCGATTGTTCTTCAATGG  
TTGATGGTGATAGTGTTTTGGATGCTAGCATGTGCCAAGATCCTCAACGCAAAGGCAACGTGATACTCTCTCAGGC  
TTACGGGTGCCAAGATCCTCAACGCAAAGGCAACGTGATACTCTCTCAGGCTTACTAGCCGCGGTCTAGAGGATCC

TAATGGCACAAACTCAACAAATGATGTATCGTCATCTGATCCATCGGTTTTCAATATTGTATTGGATGCAATATCTG  
AATGCATATGATGCGACAGTTTCCATCATCGGGTGCCGAATCGTAACTCTCATAACACCATTTTTAAGTTATGTAAAC  
TAGTATCTATGTTTATGGTTTACGTAAAATGAATGTTTGAGTCTACAGGAAGGAACACGTGTGTAGAAGTATTTAT  
TTCGTGAATGTACGTACATATATTTTTATGTATACGTGAACCTCACTAAAGGAAATTTTTGATGTTTTACGTATGCATT  
TATTAACAACACTCTGTAAATTATTCCATACGCTAAGATATGATTCTTTCTCGCAAATCTCCCCGGGCTGCTGGA  
AAAAATCAATTGATATATAAATAAACTTATATAAACACGTAATAAATGAGATAAATAAATATATGTCATGTATAA  
ATTTGGGGTATAATTTTAATTGTAGAAGGTGGAGATAGTACGGTAAAACTGAGATGATATATAATATATGATGA  
ATATATAAACTTGACAGGTCAAGATTACTTGATCAGATTTAATTAGTTGTGATAAAGCGGAAATCCCATATATGTC  
ATCCCGTTAAAGGTATTAATAGCATTTTAAGAATATATTTACAAATATGATATACCATACATCTGATAGAATTATG  
CATCGATATTCGTCTGTTATAGGCTTAGTTGCGCACACGAAAAGGTATGTGTATATACTTAATTATATTTCAATCAA  
ACGATGGGTGACAAATGTGTGGCGTGGAGCAAAGCAAACAGCACCACAACCTTTACAAAGGGATCTTCATTAGT  
CCTTGCAGTGTCTTTATAACTTAATAAAGTAATTCCACGCAAGAATAGTGATTATATCGCCAACAACGCACTTTTG  
TGATGTAAGTCAGGCCCTGTCAATTTGCTTTGTGGGTGGTGTTATTTTCATGAAGCAGGCGACTACTTCTTGTCGAG  
CTGCTGTGTATATTCTACTTTTGAGGCTATTATATACACTGATGTGTTTAGACATTTGTGTTATTTAATGCTTGAT  
TTAACGTTTTTTCAATTGTGTTTGCCGATACTAATGTTGTCTCAGATATAATTTATTGCACTTTACGAAAATAAGCT  
TATGGTGAGCAAGGGCGAGGAGCTGTTACCGGGGTGGTGCCATCCTGGTCGAGCTGGACGGCGACGTAAACG  
GCCACAAGTTCAGCGTGTCCGGCGAGGGCGAGGGCGATGCCACCTACGGCAAGCTGACCCTGAAGTTCATCTGCA  
CCACCGGCAAGCTGCCGTGCCCTGGCCACCCTCGTGACCACCCTGACCTACGGCGTGCAAGTTCAGCCGCTA  
CCCCGACCACATGAAGCAGCAGACTTCTTCAAGTCCGCCATGCCGAAGGCTACGTCCAGGAGCGCACCATCTTC  
TTCAAGGACGACGGCAACTACAAGACCCGCGCCGAGGTGAAGTTCGAGGGCGACACCCTGGTGAACCGCATCGA  
GCTGAAGGGCATCGACTTCAAGGAGGACGGCAACATCCTGGGGCACAAGCTGGAGTACAACAGCCACA  
ACGTCTATATCATGGCCGACAAGCAGAAGAACGGCATCAAGGTGAACCTCAAGATCCGCCACAACATCGAGGACG  
GCAGCGTGACGCTCGCCGACCACTACCAGCAGAACACCCCCATCGGCGACGGCCCCGTGCTGCTGCCCGACAACC  
ACTACCTGAGCACCCAGTCCGCCCTGAGCAAAGACCCCAACGAGAAGCGCGATCACATGGTCTGCTGGAGTTTCG  
TGACCGCCGCGGGATCACTCTCGGCATGGACGAGCTGTACAAGGCCAAGCCTTTGTCTCAAGAAGAATCCACCC  
TCATTGAAAGAGCAACGGCTACAATCAACAGCATCCCCATCTCTGAAGACTACAGCGTCGCCAGCGCAGCTCTCTC  
TAGCGACGGCCGCATCTTCACTGGTGTCAATGTATATCATTTTACTGGGGGACCTTGTCAGAACTCGTGGTGCTG  
GGCACTGCTGCTGCTGCGGCAGCTGGCAACCTGACTTGTATCGTCGCGATCGGAAATGAGAACAGGGGGCATCTTG  
AGCCCCGCGGACGGTGCCGACAGGTGCTTCTCGATCTGCATCCTGGGATCAAAGCCATAGTGAAGGACAGTGAT  
GGACAGCCGACGGCAGTTGGGATTCTGTGAATTGCTGCCCTCTGGTTATGTGTGGGAGGGCTAAGAATTCATGATC  
GCTGATGGTGCATAAAATAGTGTACCACGTTGTTTATTTTACTCTTTATATAAGGATAACATTCTTTGTTCTTCATCG  
ATAATGTGGTATAATACTGACTGCCGTTTTATTGGTAATCATTTCCGGCTCAGTTGCTTTTAGTACATCAATTTAAT  
TATTATCTGTTTTATTTCTGTTTTATAGTGTTTTAGTTTCTAGCACTTATCAAATCACGGGGTTCGGTTCGATTACACT  
GCTATGTGCTTTGAAATCGGTGTTTCGTTAGGCCATAAATACTAGTTACTATTATATGCAACGATTAACAGATAA  
TTATATCGGCAGTGGTTTGTTAAGCTTCTTGGCACGCTTTATTGCTCTGCGCCGAGCTTCCCATTCTTGATCGTGTGC  
TGCAGTCTCCTTAACTGTGCGTTCAGTCGTTCCATATATGCCTTCTTCTGTTGATATATCTACTAGTGTAGGTAC  
CTCATCTTGATATCGCTCATCCTCAACTTCTTCATCTGAGTCTGCCTCAAACACCACATGCTTCTGTTCAAGTTGTTG  
ATTGTTTCCACACCACGTAGTTTAGCAACACCATGCCTATTTAATCGGAATTTCTTCTTGTGATGCTAGGTTGGCT  
TTCAGCTTTACATCTTCGTTATCCTCTGTTGCCCTTTGTTCTATGTAATGTTTCAGGTCGTCATCCACTCTCGAGGCAT  
CAGTTCCAACACGTGTGAGTATATTATCCGTGTCAGCGTCAGATTCATCGGACGATTATCCGAATCCACGACAGT  
ACTACTGACATCAGACTCACTTGCGATGTCCACCTTTGTTTCATTAGACAGCTGTTTCTTGGCTTTTATCTTTTCCTTT  
AGCTTCGAGAGCTTCGAAGGCTTTTCGCTAGTATTGTCATTTACAGTTATTTGGGGTGCTG



**Seq 11: Figure 7 A- TF transmission (1250 bp band)**

ATCGCTTGACCTATGTTATGGTTTCTGAACGTCGTTCTGCTGCTAGCAGTGAGTTTGTGCTCTATGTGCGAAGAC  
TACTAAATGCTCTCGCAGTCGTAACCTGCAACAGGCGCATATAATGCACCTCATTCGTATGCACAAGAACCCTTGG  
AAGCAGTATTTGGATGAGGAGGGACTCACTAAAATGTGTAGATCCGCTCTGGATGCTTTGTATCAGCAGCGTGGT  
TTTACTGCTACAAGTGAATGGAAGTTGAGGCCGGGTCTCACTCCACCTGAGCCTGGGTTCGATTGTTCTTCAATGG  
TTGATGGTGATAGTGTTTTGGATTAGATGATCGCTGATGGTGCATAAAATAGTGTACCACGTTGTTTATTTTACTCT  
TTATATAAGGATAACATTCTTTGTTCTTCATCGATAATGTGGTATAATACTGACTGCCGGTTTTATTGGTAATCATT  
CGGCTCAGTTGCTTTTAGTACATCAATTTAATTATTATCTGTTTTATTTCTGTTTTATAGTGTTTTAGTTTCTAGCACT  
TATCAAATCACGGGGTTCGGTCGCATTACACTGCTATGTGCTTTGAAATCGGTGTTTCGTTAGGCCTAATAATTACT  
AGTTACTATTATATGCAACGATTAACAGATAATTATATCGGCAGTGGTTTGTTAAGCTTCTTGGCACGCTTTATTGC  
TCTGCGCCGAGCTTCCATTCTTGATCGTGTGCTGCAGTCTCCTTAACTGTGCGTTCAGTCGTTCCATATATGCCTT  
CTTCTCTGTTGATATATCTACTAGTGTAGGTACCTCATCTTGATATCGCTCATCCTCAACTTCTTCATCTGAGTCTGCC  
TCAAACACCACATGCTTCTGTTGAGTTGTTTGATTGTTTCCACACCACGTAGTTTAGCAACACCATGCCTATTTAAT  
CGGAATTTCTTCTGTTGATGCTAGGTTGGCTTTCAGCTTACATCTTCGTTATCCTCTGTTGCCTTTTGTCTATGT  
AATGTTTCAGGTCGTCATCCACTGCATCAGTTCCAACACGTGTGAGTATATTATCCGTGTCAGCGTCAGATTCATCG  
GACGATTCATCCGAATCCACGACGACTACTGACATCAGACTCACTTGCATGTCCACCTTTGTTTCATTAGACAG  
CTGTTTCTGGCTTTTATCTTTTCTTTAGCTTCGAGAGCTTCGAAGGCTTTTCGCTAGTATTGTCATTTACAGTTATT  
TGGGGTGCTG

**Seq 12: Figure 7 A-WT transmission (d -1250 bp)**

ATCGCTTGACCTATGTTATGGTTTCTGAACGTCGTTCTGCTGCTAGCAGTGAGTTTGTGCTCTATGTGCGAAGAC  
TACTAAATGCTCTCGCAGTCGTAACCTGCAACAGGCGCATATAATGCACCTCATTCGTATGCACAAGAACCCTTGG  
AAGCAGTATTTGGATGAGGAGGGACTCACTAAAATGTGTAGATCCGCTCTGGATGCTTTGTATCAGCAGCGTGGT  
TTTACTGCTACAAGTGAATGGAAGTTGAGGCCGGGTCTCACTCCACCTGAGCCTGGGTTCGATTGTTCTTCAATGG  
TTGATGGTGATAGTGTTTTGGATTAGATGATCGCTGATGGTGCATAAAATAGTGTACCACGTTGTTTATTTTACTCT  
TTATATAAGGATAACATTCTTTGTTCTTCATCGATAATGTGGTATAATACTGACTGCCGGTTTTATTGGTAATCATT  
CGGCTCAGTTGCTTTTAGTACATCAATTTAATTATTATCTGTTTTATTTCTGTTTTATAGTGTTTTAGTTTCTAGCACT  
TATCAAATCACGGGGTTCGGTCGCATTACACTGCTATGTGCTTTGAAATCGGTGTTTCGTTAGGCCTAATAATTACT  
AGTTACTATTATATGCAACGATTAACAGATAATTATATCGGCAGTGGTTTGTTAAGCTTCTTGGCACGCTTTATTGC  
TCTGCGCCGAGCTTCCATTCTTGATCGTGTGCTGCAGTCTCCTTAACTGTGCGTTCAGTCGTTCCATATATGCCTT  
CTTCTCTGTTGATATATCTACTAGTGTAGGTACCTCATCTTGATATCGCTCATCCTCAACTTCTTCATCTGAGTCTGCC  
TCAAACACCACATGCTTCTGTTGAGTTGTTTGATTGTTTCCACACCACGTAGTTTAGCAACACCATGCCTATTTAAT  
CGGAATTTCTTCTGTTGATGCTAGGTTGGCTTTCAGCTTACATCTTCGTTATCCTCTGTTGCCTTTTGTCTATGT  
AATGTTTCAGGTCGTCATCCACTGCATCAGTTCCAACACGTGTGAGTATATTATCCGTGTCAGCGTCAGATTCATCG  
GACGATTCATCCGAATCCACGACGACTACTGACATCAGACTCACTTGCATGTCCACCTTTGTTTCATTAGACAG  
CTGTTTCTGGCTTTTATCTTTTCTTTAGCTTCGAGAGCTTCGAAGGCTTTTCGCTAGTATTGTCATTTACAGTTATT  
TGGGGTGCTG

**Seq 13: Figure 7 B1- TF acquisition (1551 bp band)**

ATGTCAGTACTGCTCAGCCGAACACGTTGCACAGGAAGTGCCTACTCACGTTATTCCCTATTCTGAGAACTACAT  
GGGATATTACCCTGGTGATATGAGTGCAGGTCTACAATGTCACGGTTACCTGCCTTCTCCTCAATACACTCAATATT  
ATGATGACCTTACATGGGTACAGCGGTTGACTACATGAACGTACCTGTTACCAGATGGTCCCAGATGACCATCA  
TGTTTACGTCGACTCTCATGTTGGACAAATGCCCCGACTACTCCGGTGGCATGATGTACCATCCTATGGAGATGACA

TACTGCCCTCCTACTGGGCAGATGTACTATCAAACACCTGGATCGAGTACCGTACCGGCATTAAGCAGCGTCAAGG  
GGGATCCCGATGACGATGCTCGTACTTTTACTGAATGCAGTACTGCGGCAACTACTCCTAACTTGAACACTGCCC  
CAACCCCGAAGTCGTTGAAGATGGATTTGATCTTGGTTATGGATACGACTACGACCGATACGCAGTATCACCTTCT  
GACTGCTACCCTCGCCAAAGTGCTGGGTTTAGCGGTTACCCTGGTTACTGTGTGTCCAACCTTGACGATGTATTTTC  
CGCTTGTGGCGACCAGGACCCTTTAGTGAACGATGCTATGGTTGTGGAGATTGCTGACGAGATAGCGGCCAACGT  
CCAGTATTTACCAGACAAGGAATCCAGTGGTAAATACTCACTTGACAAAAACCACCCGATTATTGCGTCTGGCGT  
GATCTCAACAGAGGTCACTGCAGTTGGCGTTGCCGCTGGTGGGAGAACGGCAAGCGTTTGAGTAAGAACTTCAAC  
GTGAAACGCTTCGGTGAGCATGAGGCCATGTGGATGGCCATTGCTATGAAGATTCGTAACCTACGCCTGTTGAG  
CGTTTTAGTTACTCAAGGAGCAGCGTGAAGCTGTTTCGCAACTACTGTGAGCTTGTGCGTCAAAACGTTGATGGGT  
CGGTTGTTGACTATCGTGTGATCCAAAAAGTTCTATTGCTATAGCTCAGATTGGCACTGCTACGCGCAAGGCCCG  
ATCACCTCTGAACAGCACTAAGAGTGCTCAGAAGGCCAACTGGGCGCGCATCGCTTGGACCTATGTTATGGTTTCT  
GAACGTCGTTCTGCTGCTAGCAGTGTAGTTTGTGCTCTATGTGCGAAGACTACTAAATGCTCTCGCAGTCGTAACCT  
GCAACAGGCGCATATAATGCACCTCATTCGTATGCACAAGAACCCTTGGAAGCAGTATTTGGATGAGGAGGGACT  
CACTAAAATGTGTAGATCCGCTCTGGATGCTTTGTATCAGCAGCGTGGTTTTACTGCTACAAGTGAATGGAAGTTG  
AGGCCGGGTCTCACTCCACCTGAGCCTGGGTTTCGATTGTTCTTCAATGGTTGATGGTGATAGTGTGTTTGGATGCTA  
GCATGTGCCAAGATCCTCAACGCAAAGGCAACGTGATACTCTCTCAGGCTTACGGGTGCCAAGATCCTCAACGCAA  
AGGCAACGTGATACTCTCTCAGGCTTACTAG

**Seq 14: Figure 7 B1 - TF transmission (1551 bp band)**

ATGTCACTGACTGCTCAGCCGAACACGTTGCACAGGAAGTGCCTACTCACGTTATTCCTATTCTGAGAACTACAT  
GGGATATTACCCTGGTGATATGAGTGCAGGTCTACAATGTCACGGTTACCTGCCTTCTCCTCAATACTCAATATT  
ATGATGACCCTTACATGGGTACAGCGTTGACTACATGAACGTCACCTGTTACCAGATGGTCCCAGATGACCATCA  
TGGTTACGTCGACTCTCATGTTGGACAAATGCCGACTACTCCGGTGGCATGATGTACCATCCTATGGAGATGACA  
TACTGCCCTCCTACTGGGCAGATGTACTATCAAACACCTGGATCGAGTACCGTACCGGCATTAAGCAGCGTCAAGG  
GGGATCCCGATGACGATGCTCGTACTTTTACTGAATGCAGTACTGCGGCAACTACTCCTAACTTGAACACTGCCC  
CAACCCCGAAGTCGTTGAAGATGGATTTGATCTTGGTTATGGATACGACTACGACCGATACGCAGTATCACCTTCT  
GACTGCTACCCTCGCCAAAGTGCTGGGTTTAGCGGTTACCCTGGTTACTGTGTGTCCAACCTTGACGATGTATTTTC  
CGCTTGTGGCGACCAGGACCCTTTAGTGAACGATGCTATGGTTGTGGAGATTGCTGACGAGATAGCGGCCAACGT  
CCAGTATTTACCAGACAAGGAATCCAGTGGTAAATACTCACTTGACAAAAACCACCCGATTATTGCGTCTGGCGT  
GATCTCAACAGAGGTCACTGCAGTTGGCGTTGCCGCTGGTGGGAGAACGGCAAGCGTTTGAGTAAGAACTTCAAC  
GTGAAACGCTTCGGTGAGCATGAGGCCATGTGGATGGCCATTGCTATGAAGATTCGTAACCTACGCCTGTTGAG  
CGTTTTAGTTACTCAAGGAGCAGCGTGAAGCTGTTTCGCAACTACTGTGAGCTTGTGCGTCAAAACGTTGATGGGT  
CGGTTGTTGACTATCGTGTGATCCAAAAAGTTCTATTGCTATAGCTCAGATTGGCACTGCTACGCGCAAGGCCCG  
ATCACCTCTGAACAGCACTAAGAGTGCTCAGAAGGCCAACTGGGCGCGCATCGCTTGGACCTATGTTATGGTTTCT  
GAACGTCGTTCTGCTGCTAGCAGTGTAGTTTGTGCTCTATGTGCGAAGACTACTAAATGCTCTCGCAGTCGTAACCT  
GCAACAGGCGCATATAATGCACCTCATTCGTATGCACAAGAACCCTTGGAAGCAGTATTTGGATGAGGAGGGACT  
CACTAAAATGTGTAGATCCGCTCTGGATGCTTTGTATCAGCAGCGTGGTTTTACTGCTACAAGTGAATGGAAGTTG  
AGGCCGGGTCTCACTCCACCTGAGCCTGGGTTTCGATTGTTCTTCAATGGTTGATGGTGATAGTGTGTTTGGATGCTA  
GCATGTGCCAAGATCCTCAACGCAAAGGCAACGTGATACTCTCTCAGGCTTACGGGTGCCAAGATCCTCAACGCAA  
AGGCAACGTGATACTCTCTCAGGCTTACTAG

**Seq 15: Figure 7 B2- TF acquisition (1109 bp band)**

ATGGTGAGCAAGGGCGAGGAGCTGTTACCGGGGTGGTGCCCATCCTGGTCGAGCTGGACGGCGACGTAAACG  
GCCACAAGTTCAGCGTGTCGGGCGAGGGCGAGGGCGATGCCACCTACGGCAAGCTGACCCTGAAGTTCATCTGCA  
CCACCGGCAAGCTGCCCCGTGCCCTGGCCCACCCTCGTGACCACCCTGACCTACGGCGTGCACTGCTTCAGCCGCTA  
CCCCGACCACATGAAGCAGCACGACTTCTTCAAGTCCGCCATGCCCCGAAGGCTACGTCCAGGAGCGCACCATCTTC  
TTCAAGGACGACGGCAACTACAAGACCCGCGCCGAGGTGAAGTTCGAGGGCGACACCCTGGTGAACCGCATCGA  
GCTGAAGGGCATCGACTTCAAGGAGGACGGCAACATCCTGGGGCACAAGCTGGAGTACAACAGCCACA  
ACGTCTATATCATGGCCGACAAGCAGAAGAACGGCATCAAGGTGAAGTTCGAGTCCGCCACAACATCGAGGACG  
GCAGCGTGCACTCGCCGACCACTACCAGCAGAACACCCCCATCGGCGACGGCCCCGTGCTGCTGCCCCGACAACC  
ACTACCTGAGCACCCAGTCCGCCCTGAGCAAAGACCCCAACGAGAAGCGCGATCACATGGTCCTGCTGGAGTTTCG  
TGACCGCCCGGGGATCACTCTCGGCATGGACGAGCTGTACAAGGCCAAGCCTTTGTCTCAAGAAGAATCCACCC  
TCATTGAAAGAGCAACGGCTACAATCAACAGCATCCCCATCTCTGAAGACTACAGCGTCGCCAGCGCAGCTCTCTC  
TAGCGACGGCCGCATCTTCACTGGTGTCAATGTATATCATTTTACTGGGGGACCTTGTGCAGAACTCGTGGTGCTG  
GGCACTGCTGCTGCTGCGGCAGCTGGCAACCTGACTTGTATCGTCGCGATCGGAAATGAGAACAGGGGGCATCTTG  
AGCCCCGCGGACGGTGCCGACAGGTGCTTCTCGATCTGCATCCTGGGATCAAAGCCATAGTGAAGGACAGTGAT  
GGACAGCCGACGGCAGTTGGGATTCTGTAATTGCTGCCCTCTGGTTATGTGTGGGAGGG

**Seq 16: Figure 7 B2- TF transmission (1109 bp band)**

ATGGTGAGCAAGGGCGAGGAGCTGTTACCGGGGTGGTGCCCATCCTGGTCGAGCTGGACGGCGACGTAAACG  
GCCACAAGTTCAGCGTGTCGGGCGAGGGCGAGGGCGATGCCACCTACGGCAAGCTGACCCTGAAGTTCATCTGCA  
CCACCGGCAAGCTGCCCCGTGCCCTGGCCCACCCTCGTGACCACCCTGACCTACGGCGTGCACTGCTTCAGCCGCTA  
CCCCGACCACATGAAGCAGCACGACTTCTTCAAGTCCGCCATGCCCCGAAGGCTACGTCCAGGAGCGCACCATCTTC  
TTCAAGGACGACGGCAACTACAAGACCCGCGCCGAGGTGAAGTTCGAGGGCGACACCCTGGTGAACCGCATCGA  
GCTGAAGGGCATCGACTTCAAGGAGGACGGCAACATCCTGGGGCACAAGCTGGAGTACAACAGCCACA  
ACGTCTATATCATGGCCGACAAGCAGAAGAACGGCATCAAGGTGAAGTTCGAGTCCGCCACAACATCGAGGACG  
GCAGCGTGCACTCGCCGACCACTACCAGCAGAACACCCCCATCGGCGACGGCCCCGTGCTGCTGCCCCGACAACC  
ACTACCTGAGCACCCAGTCCGCCCTGAGCAAAGACCCCAACGAGAAGCGCGATCACATGGTCCTGCTGGAGTTTCG  
TGACCGCCCGGGGATCACTCTCGGCATGGACGAGCTGTACAAGGCCAAGCCTTTGTCTCAAGAAGAATCCACCC  
TCATTGAAAGAGCAACGGCTACAATCAACAGCATCCCCATCTCTGAAGACTACAGCGTCGCCAGCGCAGCTCTCTC  
TAGCGACGGCCGCATCTTCACTGGTGTCAATGTATATCATTTTACTGGGGGACCTTGTGCAGAACTCGTGGTGCTG  
GGCACTGCTGCTGCTGCGGCAGCTGGCAACCTGACTTGTATCGTCGCGATCGGAAATGAGAACAGGGGGCATCTTG  
AGCCCCGCGGACGGTGCCGACAGGTGCTTCTCGATCTGCATCCTGGGATCAAAGCCATAGTGAAGGACAGTGAT  
GGACAGCCGACGGCAGTTGGGATTCTGTAATTGCTGCCCTCTGGTTATGTGTGGGAGGG

**Seq 17: Figure 7 B3- TF acquisition (1440 bp band)**

ATGTCACTGACTGCTCAGCCGAACACGTTGCACAGGAAGTGCCTACTCACGTTATTCCTATTCTGAGAACTACAT  
GGGATATTACCCTGGTGATATGAGTGCAGGTCTACAATGTCACGGTTACCTGCCTTCTCCTCAATACACTCAATATT  
ATGATGACCCTTACATGGGTACAGCGGTTGACTACATGAACGTACCTGTTACCAGATGGTACCGGATGACCATCA  
TGTTTACGTCGACTCTCATGTTGGACAAATGCCCCGACTACTCCGGTGGCATGATGTACCATCCTATGGAGATGACA  
TACTGCCCTCCTACTGGGCAGATGTACTATCAAACACCTGGATCGAGTACCGTACCGGCATTAAGCAGCGTCAAGG  
GGGATCCCGATGACGATGCTCGTACTTTTACTGAATGCAGTACTGCGGCAACTACTCCTAAGTGAAGCACTGCCC  
CAACCCGAAGTCGTTGAAGATGGATTTGATCTTGTTATGGATACGACTACGACCGATACGCAGTATCACCTTCT

GACTGCTACCCTCGCCAAAGTGCTGGGTTTAGCGGTTACCCTGGTTACTGTGTGTCCAACCTTGACGATGTATTTTC  
CGCTTGTGGCGACCAGGACCCTTTAGTGAACGATGCTATGGTTGTGGAGATTGCTGACGAGATAGCGGCCAACGT  
CCAGTATTTACCAGACAAGGAATCCAGTGGTAAATACTCACTTGACAAAAACCACCCGATTCAATTGCGTCTGGCGT  
GATCTCAACAGAGGTCACTGCAGTTGGCGTTGCCGCTGGTGGGAGAACGGCAAGCGTTTGAGTAAGAACTTCAAC  
GTGAAACGCTTCGGTGAGCATGAGGCCATGTGGATGGCCATTGCTATGAAGATTCGTAACCTACGCCTGTTGAG  
CGTTTTAGTTACTCAAGGAGCAGCGTGAAGCTGTTGCAACTACTGTGAGCTTGTGCGTCAAAACGTTGATGGGT  
CGGTTGTTGACTATCGTGTTGATCCAAAGAGCTCTATTGCTATAGCTCAGATTGGCACTGCTACGCGCAAGGCCCG  
ATCACCTCTGAACAGCACTAAGAGTGCTCAGAAGGCCAACTGGGCGCGCATCGCTTGGACCTATGTTATGGTTTCT  
GAACGTCGTTCTGCTGCTAGCAGTGTAGTTTGTGCTCTATGTGCGAAGACTACTAAATGCTCTCGCAGTCGTAACCT  
GCAACAGGCGCATATAATGCACCTCATTCGTATGCACAAGAACCCTTGAAGCAGTATTTGGATGAGGAGGGACT  
CACTAAAATGTGTAGATCCGCTCTGGATGCTTTGTATCAGCAGCGTGGTTTTACTGCTACAAGTGAATGGAAGTTG  
AGGCCGGGTCTCACTCCACCTGAGCCTGGGTTTCGATTGTTCTTCAATGGTTGATGGTGATAGTGTGTTTGGAT

**Seq 18: Figure 7 B3- WT acquisition (1440 bp band)**

ATGTCACTGACTGCTCAGCCGAACACGTTGCACAGGAAGTGCCTACTCACGTTATTCCTATTCTGAGAACTACAT  
GGGATATTACCCTGGTGATATGAGTGCAGGTCTACAATGTCACGGTTACCTGCCTTCTCCTCAATACACTCAATATT  
ATGATGACCTTACATGGGTACAGCGGTTGACTACATGAACGTCACCTGTTACCAGATGGTACCGGATGACCATCA  
TGGTTACGTCGACTCTCATGTTGGACAAATGCCCCGACTACTCCGGTGGCATGATGTACCATCCTATGGAGATGACA  
TACTGCCCTCCTACTGGGCAGATGTACTATCAAACACCTGGATCGAGTACCGTACCGGCATTAAGCAGCGTCAAGG  
GGGATCCCGATGACGATGCTCGTACTTTTACTGAATGCAGTACTGCGGCAACTACTCCTAACTTGAACACTGCCC  
CAACCCCGAAGTCGTTGAAGATGGATTTGATCTTGGTTATGGATACGACTACGACCGATACGCAGTATCACCTTCT  
GACTGCTACCCTCGCCAAAGTGCTGGGTTTAGCGGTTACCCTGGTTACTGTGTGTCCAACCTTGACGATGTATTTTC  
CGCTTGTGGCGACCAGGACCCTTTAGTGAACGATGCTATGGTTGTGGAGATTGCTGACGAGATAGCGGCCAACGT  
CCAGTATTTACCAGACAAGGAATCCAGTGGTAAATACTCACTTGACAAAAACCACCCGATTCAATTGCGTCTGGCGT  
GATCTCAACAGAGGTCACTGCAGTTGGCGTTGCCGCTGGTGGGAGAACGGCAAGCGTTTGAGTAAGAACTTCAAC  
GTGAAACGCTTCGGTGAGCATGAGGCCATGTGGATGGCCATTGCTATGAAGATTCGTAACCTACGCCTGTTGAG  
CGTTTTAGTTACTCAAGGAGCAGCGTGAAGCTGTTGCAACTACTGTGAGCTTGTGCGTCAAAACGTTGATGGGT  
CGGTTGTTGACTATCGTGTTGATCCAAAGAGCTCTATTGCTATAGCTCAGATTGGCACTGCTACGCGCAAGGCCCG  
ATCACCTCTGAACAGCACTAAGAGTGCTCAGAAGGCCAACTGGGCGCGCATCGCTTGGACCTATGTTATGGTTTCT  
GAACGTCGTTCTGCTGCTAGCAGTGTAGTTTGTGCTCTATGTGCGAAGACTACTAAATGCTCTCGCAGTCGTAACCT  
GCAACAGGCGCATATAATGCACCTCATTCGTATGCACAAGAACCCTTGAAGCAGTATTTGGATGAGGAGGGACT  
CACTAAAATGTGTAGATCCGCTCTGGATGCTTTGTATCAGCAGCGTGGTTTTACTGCTACAAGTGAATGGAAGTTG  
AGGCCGGGTCTCACTCCACCTGAGCCTGGGTTTCGATTGTTCTTCAATGGTTGATGGTGATAGTGTGTTTGGAT

**Seq 19: Figure 7 B3- TF transmission (1440 bp band)**

ATGTCACTGACTGCTCAGCCGAACACGTTGCACAGGAAGTGCCTACTCACGTTATTCCTATTCTGAGAACTACAT  
GGGATATTACCCTGGTGATATGAGTGCAGGTCTACAATGTCACGGTTACCTGCCTTCTCCTCAATACACTCAATATT  
ATGATGACCTTACATGGGTACAGCGGTTGACTACATGAACGTCACCTGTTACCAGATGGTACCGGATGACCATCA  
TGGTTACGTCGACTCTCATGTTGGACAAATGCCCCGACTACTCCGGTGGCATGATGTACCATCCTATGGAGATGACA  
TACTGCCCTCCTACTGGGCAGATGTACTATCAAACACCTGGATCGAGTACCGTACCGGCATTAAGCAGCGTCAAGG  
GGGATCCCGATGACGATGCTCGTACTTTTACTGAATGCAGTACTGCGGCAACTACTCCTAACTTGAACACTGCCC  
CAACCCCGAAGTCGTTGAAGATGGATTTGATCTTGGTTATGGATACGACTACGACCGATACGCAGTATCACCTTCT  
GACTGCTACCCTCGCCAAAGTGCTGGGTTTAGCGGTTACCCTGGTTACTGTGTGTCCAACCTTGACGATGTATTTTC  
CGCTTGTGGCGACCAGGACCCTTTAGTGAACGATGCTATGGTTGTGGAGATTGCTGACGAGATAGCGGCCAACGT

CCAGTATTTACCAGACAAGGAATCCAGTGGTAAATACTCACTTGACAAAAACCACCCGATTATTGCGTCTGGCGT  
 GATCTCAACAGAGGTCACTGCAGTTGGCGTTGCCGCTGGTGGGAGAACGGCAAGCGTTTGAGTAAGAACTTCAAC  
 GTGAAACGCTTCGGTGAGCATGAGGCCATGTGGATGGCCATTGCTATGAAGATTCGTAACCTACGCCTGTTGAG  
 CGTTTTAGTTACTCAAGGAGCAGCGTGAAGCTGTTGCGAACTACTGTGAGCTTGTGCGTCAAAACGTTGATGGGT  
 CGGTTGTTGACTATCGTGTGATCCAAAGAGCTCTATTGCTATAGCTCAGATTGGCACTGCTACGCGCAAGGCCCCG  
 ATCACCTCTGAACAGCACTAAGAGTGCTCAGAAGGCCAACTGGGCGCGCATCGCTTGGACCTATGTTATGGTTTCT  
 GAACGTCGTTCTGCTGCTAGCAGTGTAGTTTGTGCTCTATGTGCGAAGACTACTAAATGCTCTCGCAGTCGTAACCT  
 GCAACAGGCGCATATAATGCACCTCATTGCTATGCACAAGAACCCTTGGAAGCAGTATTTGGATGAGGAGGGACT  
 CACTAAAATGTGTAGATCCGCTCTGGATGCTTTGTATCAGCAGCGTGGTTTTACTGCTACAAGTGAATGGAAGTTG  
 AGGCCGGGTCTCACTCCACCTGAGCCTGGGTTGATTGTTCTTCAATGGTTGATGGTGATAGTGTGTTTGGAT

**Seq 20: Figure 7 B3- WT transmission (1440 bp band)**

ATGTCACTGACTGCTCAGCCCGAACACGTTGCACAGGAAGTGCCTACTCACGTTATTCCTATTCTGAGAACTACAT  
 GGGATATTACCTGGTGATATGAGTGCAGGTCTACAATGTCACGGTTACCTGCCTTCTCCTCAATACACTCAATATT  
 ATGATGACCTTACATGGGTACAGCGGTTGACTACATGAACGTCACCTGTTACCAGATGGTACCGGATGACCATCA  
 TGGTTACGTCGACTCTCATGTTGGACAAATGCCCCACTACTCCGGTGGCATGATGTACCATCCTATGGAGATGACA  
 TACTGCCCTCCTACTGGGCAGATGTACTATCAAACACCTGGATCGAGTACCGTACCGGCATTAAGCAGCGTCAAGG  
 GGGATCCCGATGACGATGCTCGTACTTTTACTGAATGCAGTACTGCGGCAACTACTCCTAAGTGAACACTGCCC  
 CAACCCCGAAGTCGTTGAAGATGGATTTGATCTTGTTATGGATACGACTACGACCGATACGCAGTATCACCTTCT  
 GACTGCTACCCTCGCCAAAGTGCTGGGTTTAGCGGTTACCCTGGTTACTGTGTGTCCAACCTTGACGATGTATTTT  
 CGCTTGTGGCGACCAGGACCCTTTAGTGAACGATGCTATGGTTGTGGAGATTGCTGACGAGATAGCGGCCAACGT  
 CCAGTATTTACCAGACAAGGAATCCAGTGGTAAATACTCACTTGACAAAAACCACCCGATTATTGCGTCTGGCGT  
 GATCTCAACAGAGGTCACTGCAGTTGGCGTTGCCGCTGGTGGGAGAACGGCAAGCGTTTGAGTAAGAACTTCAAC  
 GTGAAACGCTTCGGTGAGCATGAGGCCATGTGGATGGCCATTGCTATGAAGATTCGTAACCTACGCCTGTTGAG  
 CGTTTTAGTTACTCAAGGAGCAGCGTGAAGCTGTTGCGAACTACTGTGAGCTTGTGCGTCAAAACGTTGATGGGT  
 CGGTTGTTGACTATCGTGTGATCCAAAGAGCTCTATTGCTATAGCTCAGATTGGCACTGCTACGCGCAAGGCCCCG  
 ATCACCTCTGAACAGCACTAAGAGTGCTCAGAAGGCCAACTGGGCGCGCATCGCTTGGACCTATGTTATGGTTTCT  
 GAACGTCGTTCTGCTGCTAGCAGTGTAGTTTGTGCTCTATGTGCGAAGACTACTAAATGCTCTCGCAGTCGTAACCT  
 GCAACAGGCGCATATAATGCACCTCATTGCTATGCACAAGAACCCTTGGAAGCAGTATTTGGATGAGGAGGGACT  
 CACTAAAATGTGTAGATCCGCTCTGGATGCTTTGTATCAGCAGCGTGGTTTTACTGCTACAAGTGAATGGAAGTTG  
 AGGCCGGGTCTCACTCCACCTGAGCCTGGGTTGATTGTTCTTCAATGGTTGATGGTGATAGTGTGTTTGGAT

**Seq 21: Figure 7 B4- TF acquisition (350 bp band)**

CACGAGGAAGGAACTACCGATGTTGAATATCTTGTCAACAAGGTACTCTATATGGCTACCATGAACTACAAGACTT  
 ATTTGACAGTAAACAGTATGAACGCCAAGTTCTTCAACAGATTCAGCTTCACTACAAAGATATTCAGTCGTCGATT  
 AAGCAAACATTGAGTGATATCATCAGGTGGAATGTTCTGAAGATTTTGAAGAAAGGAGCATCGAACGTATCACT  
 CACTTACTAGCAGCTACGAAGATTACATGTTGACCCAGATTCCTCAACTTTTCCAAGTTTGCACGTCGTTATGCTGAC  
 ATGGTGAAGAAGGTTCTGCTCGGTAGCTTGACCTCGTACGTTGAAGCTCCTTGG

**Seq 22: Figure 7 B4- WT acquisition (350 bp band)**

CACGAGGAAGGAACTACCGATGTTGAATATCTTGTCAACAAGGTACTCTATATGGCTACCATGAACTACAAGACTT  
 ATTTGACAGTAAACAGTATGAACGCCAAGTTCTTCAACAGATTCAGCTTCACTACAAAGATATTCAGTCGTCGATT  
 AAGCAAACATTGAGTGATATCATCAGGTGGAATGTTCTGAAGATTTTGAAGAAAGGAGCATCGAACGTATCACT

CACTTACTAGCAGCTACGAAGATTACATGTTGACCCAGATTCCAACCTCTTCCAAGTTTGCACGTCGTTATGCTGAC  
ATGGTGAAGAAGGTTCTGCTCGGTAGCTTGACCTCGTACGTTGAAGCTCCTTGG

**Seq 23: Figure 7 B4- TF acquisition (350 bp band)**

CACGAGGAAGGAACTACCGATGTTGAATATCTTGTCAACAAGGTACTCTATATGGCTACCATGAACTACAAGACTT  
ATTTGACAGTAAACAGTATGAACGCCAAGTTCTTCAACAGATTCAGCTTCACTACAAAGATATTCAGTCGTCGTATT  
AAGCAAACATTGAGTGATATCATCAGGTGGAATGTTCTGAAGATTTTGAAGAAAGGAGCATCGAACGTATCACT  
CACTTACTAGCAGCTACGAAGATTACATGTTGACCCAGATTCCAACCTCTTCCAAGTTTGCACGTCGTTATGCTGAC  
ATGGTGAAGAAGGTTCTGCTCGGTAGCTTGACCTCGTACGTTGAAGCTCCTTGG

**Seq 24: Figure 7 B4- WT transmission (350 bp band)**

CACGAGGAAGGAACTACCGATGTTGAATATCTTGTCAACAAGGTACTCTATATGGCTACCATGAACTACAAGACTT  
ATTTGACAGTAAACAGTATGAACGCCAAGTTCTTCAACAGATTCAGCTTCACTACAAAGATATTCAGTCGTCGTATT  
AAGCAAACATTGAGTGATATCATCAGGTGGAATGTTCTGAAGATTTTGAAGAAAGGAGCATCGAACGTATCACT  
CACTTACTAGCAGCTACGAAGATTACATGTTGACCCAGATTCCAACCTCTTCCAAGTTTGCACGTCGTTATGCTGAC  
ATGGTGAAGAAGGTTCTGCTCGGTAGCTTGACCTCGTACGTTGAAGCTCCTTGG
